# Supplementary material
Source: publisher figshare collection journal article supplement (https://gsajournals.figshare.com/ndownloader/files/29162166)
Supplement: Supplementary file 1 [file 29162166]

## Sheet: Onemap
Chromosome	Number	Marker (v2.1)	Position (cM)
1	1	S1_1488613	0
1	2	S1_1535167	0
1	3	S1_1553727	0
1	4	S1_1581214	0
1	5	S1_1822844	1.1
1	6	S1_1873129	1.46
1	7	S1_2323372	1.46
1	8	S1_2527772	1.59
1	6	S1_2590562	1.9
1	10	S1_2634751	1.9
1	11	S1_2705691	1.9
1	12	S1_2709413	1.9
1	13	S1_2853975	2.28
1	15	S1_2984272	3.95
1	14	S1_3008310	3.95
1	17	S1_3079653	3.95
1	18	S1_3215055	4.16
1	16	S1_3292699	4.16
1	19	S1_3321875	4.16
1	20	S1_3354688	4.42
1	21	S1_3418560	5.41
1	22	S1_3529324	6.46
1	23	S1_3535264	6.46
1	24	S1_3539875	6.46
1	25	S1_3545989	6.92
1	27	S1_3724613	7.32
1	28	S1_3724683	7.32
1	26	S1_3724839	7.32
1	29	S1_3847322	7.32
1	30	S1_3852082	7.51
1	31	S1_3869698	7.7
1	32	S1_3885898	7.7
1	33	S1_3988888	8.41
1	35	S1_4017677	8.65
1	37	S1_4046779	8.65
1	38	S1_4047470	8.65
1	39	S1_4050673	9.19
1	40	S1_4057462	9.19
1	36	S1_4061495	9.19
1	41	S1_4076672	9.56
1	34	S1_4114379	9.56
1	42	S1_4267792	9.56
1	43	S1_4633582	10.54
1	44	S1_4984144	10.54
1	45	S1_5011063	10.54
1	46	S1_5728187	11.74
1	47	S1_6349337	14.8
1	48	S1_6354945	14.8
1	50	S1_6370261	14.8
1	51	S1_6391730	14.8
1	49	S1_6474071	15.26
1	52	S1_6477445	15.26
1	53	S1_6478220	15.26
1	54	S1_6526071	15.54
1	55	S1_6604828	15.54
1	56	S1_6631976	15.54
1	57	S1_6670725	15.92
1	58	S1_6765116	16.81
1	59	S1_6769175	16.94
1	60	S1_6790940	17.55
1	61	S1_6823417	17.69
1	62	S1_6914691	18.57
1	63	S1_6914717	18.57
1	64	S1_6917832	18.57
1	66	S1_6967476	18.97
1	67	S1_7079435	19.22
1	68	S1_7080000	19.22
1	69	S1_7085341	19.25
1	70	S1_7156462	19.25
1	65	S1_7264737	19.52
1	71	S1_7395342	19.57
1	72	S1_7403826	19.57
1	73	S1_7428636	19.95
1	74	S1_7443638	20.34
1	75	S1_7501416	20.42
1	76	S1_7501526	20.62
1	77	S1_7501623	20.62
1	78	S1_7550945	21.64
1	79	S1_7577769	21.64
1	81	S1_7611871	21.64
1	80	S1_7616696	21.64
1	82	S1_7738388	21.64
1	83	S1_7989776	22.12
1	84	S1_7990325	22.12
1	85	S1_8070638	22.82
1	86	S1_8113880	23.55
1	88	S1_8123006	24.03
1	89	S1_8147526	24.03
1	87	S1_8191784	24.03
1	90	S1_8398126	24.83
1	92	S1_8494658	24.83
1	91	S1_8495820	24.91
1	95	S1_9551339	25.74
1	98	S1_9874813	26.37
1	105	S1_10456593	27.09
1	117	S1_11093514	28.82
1	130	S1_11645675	35.53
1	138	S1_11900957	36.78
1	148	S1_12231313	39.33
1	149	S1_12613566	39.85
1	150	S1_12632829	40.07
1	151	S1_12752403	42.54
1	152	S1_12892272	43.16
1	153	S1_13073249	43.42
1	154	S1_13100581	44.24
1	156	S1_13272175	45.16
1	157	S1_13327714	46.18
1	158	S1_13328163	46.18
1	159	S1_13446427	47.91
1	160	S1_14060249	49.98
1	161	S1_14060626	49.98
1	162	S1_14127658	49.98
1	164	S1_14175738	49.98
1	165	S1_14216680	50.4
1	166	S1_14225818	50.64
1	167	S1_14244473	51.35
1	168	S1_14246833	51.35
1	169	S1_14251129	51.72
1	170	S1_14290723	52.1
1	173	S1_14413608	52.29
1	178	S1_14642945	54.25
1	176	S1_14721062	54.43
1	179	S1_14721818	54.43
1	180	S1_14757191	54.43
1	181	S1_14841842	54.77
1	182	S1_14855046	55.23
1	184	S1_14944635	55.23
1	186	S1_14990390	55.48
1	188	S1_14990396	55.48
1	187	S1_15007098	55.73
1	191	S1_15161771	56.79
1	195	S1_15381356	57.64
1	198	S1_15638929	58.37
1	197	S1_15766678	58.37
1	200	S1_15826914	58.37
1	201	S1_15852466	58.56
1	203	S1_16567853	58.75
1	204	S1_16653452	58.75
1	205	S1_16725275	58.75
1	206	S1_16774487	58.75
1	202	S1_16775121	58.75
1	208	S1_16935324	59.46
1	210	S1_16969341	59.74
1	209	S1_17004483	59.74
1	212	S1_17079245	60.11
1	213	S1_17250163	60.49
1	214	S1_17439867	61.65
1	215	S1_17439889	61.65
1	216	S1_17441566	61.65
1	217	S1_17464476	62.68
1	218	S1_17505399	63.25
1	219	S1_17531057	63.25
1	220	S1_17566582	63.67
1	221	S1_17597508	63.67
1	222	S1_17601964	63.67
1	224	S1_18009804	65.8
1	225	S1_18020186	66.07
1	226	S1_18052558	66.07
1	227	S1_18164428	66.54
1	228	S1_18269690	67.88
1	229	S1_18284524	67.88
1	230	S1_19062098	69.55
1	231	S1_19071299	70.15
1	232	S1_19071322	70.15
1	233	S1_19071623	70.15
1	234	S1_19128951	70.59
1	235	S1_19170467	70.79
1	236	S1_19309649	70.99
1	237	S1_19312144	70.99
1	238	S1_19453639	71.37
1	239	S1_19553847	72.42
1	240	S1_20042895	74.52
1	241	S1_20280220	75.27
1	242	S1_20316755	75.52
1	243	S1_20393370	75.95
1	244	S1_20393671	76.13
1	245	S1_21003753	76.13
1	246	S1_21082648	76.36
1	247	S1_21193336	76.6
1	248	S1_21257929	76.6
1	249	S1_21292633	76.6
1	250	S1_21443567	76.93
1	251	S1_21445649	77.33
1	252	S1_21451100	77.6
1	253	S1_21534555	78.19
1	254	S1_21535076	78.19
1	255	S1_21903081	78.67
1	256	S1_21908626	78.67
1	257	S1_21908650	78.67
1	259	S1_24579937	80.77
1	260	S1_24697738	81.71
1	261	S1_24727643	82.08
1	262	S1_24727734	82.08
1	264	S1_25032797	82.96
1	266	S1_25045419	82.96
1	267	S1_25062835	83.24
1	268	S1_25137706	83.24
1	270	S1_25262338	83.4
1	269	S1_25262986	83.4
1	271	S1_25460525	83.4
1	273	S1_25674213	83.84
1	274	S1_25813560	84.26
1	272	S1_25872431	84.26
1	275	S1_27014104	84.26
1	276	S1_27270190	84.63
1	277	S1_28451123	85.29
1	278	S1_29310445	85.29
1	279	S1_29748221	85.29
1	280	S1_30072228	85.29
1	281	S1_30634022	85.29
1	283	S1_30797444	85.7
1	285	S1_31150524	85.7
1	286	S1_31264204	85.7
1	287	S1_31411079	85.94
1	288	S1_32130615	86
1	289	S1_32417392	86
1	291	S1_42581622	86
1	282	S1_43671703	86.5
1	292	S1_43693266	86.5
1	290	S1_43693309	86.5
1	293	S1_43736213	86.5
1	294	S1_43771564	86.5
1	295	S1_43845335	86.5
1	297	S1_44336306	87.37
1	298	S1_44367515	87.37
1	299	S1_44681106	87.63
1	300	S1_44702117	87.63
1	302	S1_45097789	87.63
1	301	S1_45192288	87.83
1	303	S1_45643944	88.3
1	304	S1_45743675	88.3
1	305	S1_46421958	88.3
1	306	S1_46642645	88.3
1	307	S1_46696491	88.3
1	308	S1_46728448	88.7
1	309	S1_46926393	89.33
1	310	S1_47891841	90.07
1	311	S1_47947056	90.07
1	312	S1_48144387	90.22
1	313	S1_50550715	93.85
1	314	S1_51024905	97.5
1	315	S1_51304118	98.36
1	316	S1_51310328	98.53
1	317	S1_51322295	98.53
1	318	S1_51342107	98.53
1	319	S1_51463526	98.53
1	320	S1_51463691	98.74
1	321	S1_51542189	98.74
1	322	S1_51666386	99.36
1	323	S1_51671884	99.58
1	324	S1_51726053	100.4
1	325	S1_51957364	100.4
1	326	S1_51962943	100.79
1	327	S1_51999607	100.79
1	328	S1_52000176	100.79
1	329	S1_52230257	102.61
1	330	S1_52288020	103.08
1	331	S1_52309920	103.08
1	332	S1_52309929	103.08
1	333	S1_52321394	103.33
1	334	S1_52353960	103.64
1	335	S1_53224836	108.31
1	336	S1_53224884	108.31
1	337	S1_53752540	116.15
1	338	S1_53758820	116.15
1	339	S1_53950805	116.72
1	340	S1_53951540	116.72
1	341	S1_54470317	117.46
1	342	S1_54658437	119.94
1	343	S1_54663706	120.18
1	344	S1_54707097	120.9
1	345	S1_54786565	120.9
1	346	S1_54788796	120.9
1	347	S1_55032174	120.9
1	349	S1_55216009	121.57
1	348	S1_55233717	121.57
1	350	S1_55243319	121.68
1	351	S1_55515038	123.42
1	352	S1_56031150	124.75
1	353	S1_56174066	125.79
1	354	S1_56198522	126.2
1	355	S1_56199593	126.2
1	356	S1_56915031	130.06
1	357	S1_56951880	130.23
1	358	S1_56952084	130.23
1	359	S1_57201523	131.88
1	360	S1_57289076	132.59
1	361	S1_57307163	132.59
1	362	S1_57492559	133.17
1	363	S1_57508506	133.17
1	364	S1_57547733	133.99
1	365	S1_57556161	133.99
1	366	S1_57556207	134.13
1	367	S1_57570718	134.52
1	368	S1_57642472	135.98
1	369	S1_57642574	136.28
1	370	S1_57758029	137.77
1	371	S1_57838901	137.77
1	372	S1_57841084	137.77
1	373	S1_57878801	137.96
1	374	S1_57878906	137.96
1	375	S1_57990706	139.27
1	376	S1_58026346	140.62
1	377	S1_58046186	141.08
1	378	S1_58064651	141.36
1	379	S1_58064852	141.36
1	380	S1_58065167	141.36
1	381	S1_58065231	141.36
1	383	S1_58132998	141.94
1	384	S1_58134547	142.13
1	385	S1_58134996	142.13
1	386	S1_58163574	142.32
1	387	S1_58304204	142.32
1	388	S1_58483152	142.54
1	389	S1_58550162	142.79
1	390	S1_58642802	143.63
1	391	S1_58793766	144.39
1	393	S1_58836445	144.69
1	394	S1_58836500	144.69
1	395	S1_58836595	144.69
1	392	S1_58917891	145.39
1	397	S1_58920522	145.39
1	396	S1_58938269	145.47
1	398	S1_58938323	145.47
1	399	S1_59070697	145.85
1	400	S1_59114221	145.85
1	401	S1_59125308	145.85
1	402	S1_59150360	145.85
1	403	S1_59204732	146.04
1	406	S1_59363976	146.04
1	407	S1_59365420	146.04
1	404	S1_59452984	146.24
1	410	S1_59460627	146.24
1	408	S1_59461381	146.24
1	409	S1_59504639	146.24
1	411	S1_59528936	146.24
1	413	S1_59619461	146.24
1	405	S1_59634451	146.67
1	412	S1_59634493	146.67
1	416	S1_59638807	146.67
1	415	S1_59639714	146.67
1	414	S1_59640624	146.67
1	417	S1_59704142	146.67
1	418	S1_59871764	147.43
1	419	S1_59883136	147.43
1	421	S1_60043340	147.67
1	420	S1_60080888	147.67
1	422	S1_60126669	148.28
1	423	S1_60145466	148.49
1	424	S1_60156230	148.49
1	425	S1_60172313	148.68
1	426	S1_60191004	148.68
1	427	S1_60194093	148.68
1	428	S1_60306115	149.06
1	429	S1_60371196	149.43
1	430	S1_60371330	149.43
1	432	S1_60416633	150.03
1	433	S1_60419131	150.03
1	435	S1_60429470	150.03
1	431	S1_60441337	150.27
1	436	S1_60441378	150.27
1	434	S1_60488585	150.6
1	437	S1_60518492	150.82
1	438	S1_60522251	150.82
1	439	S1_60522944	151.27
1	440	S1_60534566	151.27
1	441	S1_60575330	151.27
1	442	S1_60612174	151.45
1	443	S1_60705473	151.64
1	444	S1_60742949	151.64
1	445	S1_60834269	151.83
1	446	S1_60878887	152.04
1	448	S1_61045868	152.04
1	447	S1_61054267	152.04
1	450	S1_61110696	152.92
1	451	S1_61119318	152.92
1	453	S1_61126147	152.92
1	452	S1_61127645	152.92
1	449	S1_61130542	153.02
1	454	S1_61130755	153.02
1	457	S1_61229205	153.02
1	456	S1_61243233	153.25
1	458	S1_61250803	153.25
1	455	S1_61347474	153.25
1	459	S1_61364904	153.25
1	460	S1_61369098	153.67
1	461	S1_61388371	154.03
1	462	S1_61531405	154.89
1	463	S1_61535202	154.89
1	464	S1_61538268	154.89
1	465	S1_61540023	154.89
1	466	S1_61598006	155.11
1	467	S1_61628751	155.11
1	468	S1_62018042	156.06
1	469	S1_62178102	156.06
1	470	S1_62300276	156.48
1	471	S1_62699694	156.99
1	473	S1_62771441	156.99
1	474	S1_62852064	156.99
1	475	S1_62855857	156.99
1	476	S1_63108934	157.54
1	477	S1_63205343	157.87
1	478	S1_63558598	158.44
1	479	S1_63697074	158.44
1	480	S1_63711812	158.95
1	481	S1_63726970	158.95
1	483	S1_63766274	159.59
1	484	S1_63766705	159.59
1	485	S1_63814708	159.59
1	486	S1_63896283	160.05
1	487	S1_63986624	160.39
1	488	S1_64049442	160.39
1	489	S1_64052497	160.39
1	490	S1_64075282	160.65
1	491	S1_64109244	160.65
1	492	S1_64134218	160.87
1	493	S1_64134624	160.87
1	494	S1_64185927	160.87
1	495	S1_64241687	161.08
1	496	S1_64246563	161.39
1	497	S1_64325291	161.7
1	498	S1_64338558	161.7
1	499	S1_64378811	161.97
1	500	S1_64387875	161.97
1	501	S1_64524829	162.54
1	502	S1_64536210	162.54
1	503	S1_64543579	162.62
1	504	S1_64652795	163.48
1	505	S1_64676545	163.48
1	506	S1_64713799	163.79
1	507	S1_64727343	164.02
1	509	S1_64823287	164.58
1	510	S1_64825646	164.58
1	508	S1_64869683	164.58
1	511	S1_64909199	164.58
1	512	S1_64979567	165.04
1	513	S1_64985286	165.04
1	514	S1_65019035	165.04
1	515	S1_65079131	165.77
1	516	S1_65090086	165.77
1	517	S1_65121777	165.97
1	518	S1_65185695	167
1	519	S1_65205800	167.36
1	520	S1_65303209	167.73
1	521	S1_65316406	167.73
1	522	S1_65407680	168.23
1	523	S1_65407711	168.23
1	524	S1_65415935	168.58
1	526	S1_65493557	168.86
1	525	S1_65505796	169.13
1	527	S1_65506683	169.51
1	529	S1_65536439	169.51
1	528	S1_65539058	169.51
1	530	S1_65552427	169.51
1	531	S1_65574746	170.02
1	532	S1_65614604	170.02
1	533	S1_65674325	170.02
1	534	S1_65725971	170.02
1	535	S1_65754714	170.02
1	536	S1_65789450	171.02
1	537	S1_65789462	171.02
1	539	S1_66038238	171.34
1	538	S1_66262842	171.34
1	540	S1_66289755	171.34
1	541	S1_66476141	171.62
1	544	S1_66504955	172.13
1	545	S1_66504987	172.13
1	546	S1_66507358	172.18
1	542	S1_66517272	172.18
1	543	S1_66568607	172.39
1	547	S1_66591634	172.64
1	548	S1_66612939	172.64
1	549	S1_66614360	172.64
1	551	S1_66668515	173.05
1	552	S1_66678848	173.05
1	550	S1_66679053	173.05
1	553	S1_66679095	173.05
1	554	S1_66693318	173.05
1	555	S1_66842431	173.79
1	556	S1_66945466	174.68
1	557	S1_66945895	174.68
1	558	S1_67050335	175.37
1	560	S1_67126698	176.24
1	561	S1_67149179	176.49
1	562	S1_67225376	176.49
1	563	S1_67225475	176.49
1	564	S1_67232503	177.49
1	565	S1_67258417	177.49
1	566	S1_67312032	177.49
1	567	S1_67331744	177.49
1	568	S1_67361508	177.7
1	569	S1_67379596	177.9
1	570	S1_67380566	177.9
1	571	S1_67401731	178.1
1	572	S1_67434566	178.1
1	573	S1_67434961	178.29
1	574	S1_68230675	181.88
1	575	S1_68231205	181.88
1	576	S1_68789989	184.58
1	577	S1_68791040	184.79
1	578	S1_69052453	185.24
1	579	S1_69052530	185.24
1	580	S1_69052548	185.24
1	581	S1_69307256	186.63
1	582	S1_69573993	189.3
1	583	S1_69574118	189.37
1	584	S1_69661820	189.61
1	585	S1_70158324	191.46
1	586	S1_70158329	191.46
1	587	S1_70249293	191.46
1	588	S1_70469493	192.32
1	589	S1_70584083	192.61
1	590	S1_70630215	193.45
1	591	S1_70630441	193.45
1	592	S1_70722827	193.89
1	593	S1_70765349	193.89
1	594	S1_70843492	194.36
1	596	S1_70845548	194.36
1	595	S1_70915409	194.55
1	597	S1_70971010	194.55
1	598	S1_70971212	194.69
1	599	S1_70973164	194.69
1	600	S1_71010156	194.69
1	601	S1_71043820	194.69
1	602	S1_71049136	194.98
1	603	S1_71057965	194.98
1	604	S1_71062084	195.1
1	605	S1_71094633	195.63
1	606	S1_71095673	195.63
1	608	S1_71097772	195.91
1	607	S1_71100728	195.91
1	609	S1_71137208	196.4
1	610	S1_71182994	196.4
1	611	S1_71205582	196.91
1	612	S1_71364785	197.16
1	613	S1_71374808	197.16
1	614	S1_71387474	197.16
1	615	S1_71402177	197.45
1	616	S1_71405275	197.67
1	617	S1_71453543	198.09
1	618	S1_71453554	198.09
1	619	S1_71457310	198.09
1	620	S1_71521518	198.7
1	621	S1_71549636	198.7
1	622	S1_71554489	198.94
1	623	S1_71582012	198.94
1	624	S1_71593995	199.02
1	625	S1_71594007	199.02
1	627	S1_71735799	199.94
1	626	S1_71858033	200.29
1	628	S1_71858090	200.29
1	629	S1_71965765	200.96
1	630	S1_71971647	201.16
1	631	S1_71972024	201.16
1	632	S1_72170558	202.12
1	633	S1_72178570	202.3
1	634	S1_72180745	202.52
1	635	S1_72183893	202.52
1	636	S1_72216278	202.52
1	637	S1_72216912	202.52
1	639	S1_72239487	202.71
1	641	S1_72285811	202.94
1	638	S1_72285841	203.12
1	640	S1_72287128	203.12
1	643	S1_72312839	203.7
1	644	S1_72321362	203.7
1	646	S1_72341350	203.7
1	647	S1_72342352	203.7
1	648	S1_72344185	203.7
1	642	S1_72391229	203.7
1	649	S1_72398749	203.88
1	650	S1_72438209	203.88
1	651	S1_72452609	203.88
1	652	S1_72455981	203.88
1	645	S1_72470607	204.27
1	653	S1_72472389	204.67
1	654	S1_72510903	204.86
1	655	S1_72525823	204.86
1	656	S1_72578958	205.49
1	657	S1_72599587	205.49
1	658	S1_72617356	205.72
1	660	S1_72676680	206.09
1	661	S1_72714172	206.09
1	659	S1_72761445	206.38
1	662	S1_72761470	206.38
1	664	S1_72786624	206.65
1	663	S1_72789598	206.65
1	665	S1_72793219	206.65
1	667	S1_72820908	207.29
1	668	S1_72825403	207.29
1	669	S1_72855089	207.29
1	666	S1_72915736	207.29
1	670	S1_73129021	207.67
1	671	S1_73162697	207.67
2	674	S2_320174	0
2	673	S2_320245	0
2	675	S2_373877	0
2	676	S2_466119	0.19
2	677	S2_466279	0.2
2	678	S2_470764	0.39
2	679	S2_487510	0.91
2	680	S2_487687	0.91
2	681	S2_598521	1.11
2	683	S2_673587	1.11
2	684	S2_702072	1.46
2	682	S2_716744	1.68
2	685	S2_744007	1.68
2	686	S2_825353	2.06
2	687	S2_845657	2.06
2	688	S2_1027317	2.06
2	689	S2_1222092	3.24
2	690	S2_1252712	3.24
2	691	S2_1293845	3.24
2	692	S2_1462317	3.71
2	693	S2_1477370	4.4
2	694	S2_1496872	4.4
2	695	S2_1538032	4.4
2	696	S2_1575967	4.4
2	697	S2_1620259	4.71
2	698	S2_1682507	4.71
2	699	S2_1682568	4.71
2	700	S2_1746637	5.06
2	701	S2_1815976	5.06
2	702	S2_1909704	5.06
2	703	S2_1972154	5.44
2	705	S2_2443344	7.96
2	706	S2_2446133	7.96
2	707	S2_2452343	7.96
2	704	S2_2452801	8.06
2	708	S2_2452881	8.06
2	709	S2_2598427	8.76
2	710	S2_3032876	10.71
2	711	S2_3033835	11.43
2	712	S2_3040335	11.68
2	713	S2_3160020	11.98
2	714	S2_3304499	12.94
2	715	S2_3400222	13.58
2	716	S2_3781633	15.57
2	717	S2_3781725	15.57
2	718	S2_4207191	17.67
2	719	S2_4267845	17.67
2	720	S2_4572221	19.73
2	721	S2_4591125	19.73
2	722	S2_4591332	19.73
2	723	S2_4599459	19.73
2	724	S2_4657139	20.1
2	725	S2_4665468	20.1
2	726	S2_4701843	20.54
2	727	S2_4738313	20.72
2	728	S2_4750954	20.72
2	729	S2_4752098	20.72
2	730	S2_4758396	20.91
2	731	S2_4759868	21.14
2	732	S2_4793459	21.38
2	733	S2_4793465	21.38
2	734	S2_4822718	21.38
2	735	S2_4829023	21.59
2	736	S2_4830920	21.59
2	737	S2_5492103	22.85
2	738	S2_5565512	23.26
2	739	S2_5565932	23.45
2	740	S2_5576397	23.45
2	742	S2_5638338	24.59
2	741	S2_5654809	24.96
2	743	S2_5671393	25.23
2	744	S2_5708112	25.23
2	745	S2_5825382	25.23
2	746	S2_5868878	25.64
2	747	S2_5869393	25.64
2	748	S2_5869462	25.64
2	749	S2_5997688	26.11
2	750	S2_6019182	26.11
2	751	S2_6022598	27.41
2	752	S2_6025630	27.41
2	753	S2_6025696	27.41
2	754	S2_6046566	28.03
2	755	S2_6046718	28.03
2	756	S2_6052559	28.03
2	757	S2_6054078	28.29
2	758	S2_6055530	28.29
2	759	S2_6055734	29.01
2	760	S2_6110396	29.01
2	761	S2_6228705	29.23
2	762	S2_6230957	29.23
2	763	S2_6242752	29.23
2	764	S2_6693453	32.63
2	766	S2_6695091	33.08
2	767	S2_6697619	33.45
2	768	S2_6762173	33.45
2	765	S2_6766244	33.45
2	769	S2_6769582	33.45
2	770	S2_6788020	33.74
2	771	S2_6794547	34.46
2	772	S2_6795538	34.46
2	773	S2_6856244	35.69
2	774	S2_6898914	36.21
2	776	S2_6899087	36.21
2	777	S2_6899158	36.69
2	778	S2_6899761	36.69
2	775	S2_6950746	36.69
2	779	S2_7027912	36.86
2	780	S2_7091539	37.19
2	781	S2_7101851	37.19
2	782	S2_7405189	38.9
2	783	S2_7414044	39.18
2	784	S2_7414096	39.18
2	785	S2_7450828	39.18
2	786	S2_7542880	40.42
2	787	S2_7670030	40.85
2	788	S2_7693822	41.41
2	789	S2_7696370	41.41
2	790	S2_7720414	43.03
2	791	S2_7784961	43.94
2	792	S2_7840012	44.46
2	793	S2_7894092	44.46
2	794	S2_8165399	45.1
2	795	S2_8175385	45.31
2	796	S2_8227702	45.31
2	797	S2_8342822	46.22
2	798	S2_8351715	46.22
2	799	S2_8606532	46.5
2	800	S2_8639608	46.5
2	801	S2_8902276	47.37
2	802	S2_8906168	47.62
2	803	S2_8941831	47.88
2	804	S2_9356256	49.21
2	805	S2_9384430	49.77
2	806	S2_9870683	53.64
2	807	S2_9935580	53.83
2	808	S2_9984342	53.83
2	809	S2_10039164	53.83
2	810	S2_10232305	54.39
2	811	S2_10235225	54.58
2	812	S2_10256650	54.58
2	813	S2_10312830	55.16
2	814	S2_10343813	55.16
2	816	S2_10891584	55.9
2	818	S2_11141854	57.83
2	817	S2_11142740	57.83
2	820	S2_11357925	58.06
2	819	S2_11401633	58.06
2	821	S2_12447484	61.17
2	822	S2_12465187	61.17
2	823	S2_12468165	61.31
2	824	S2_12478871	61.63
2	825	S2_12496086	61.9
2	826	S2_12587974	62.77
2	827	S2_12746826	64.08
2	828	S2_12747874	64.08
2	829	S2_13052924	65.09
2	830	S2_13133104	65.09
2	832	S2_13283995	65.09
2	833	S2_13303182	65.09
2	831	S2_13459912	65.49
2	834	S2_13882268	66.65
2	835	S2_13891743	66.65
2	836	S2_14149728	66.65
2	837	S2_14161620	66.65
2	838	S2_14400186	66.99
2	870	S6_14454189	67.4
2	839	S2_14903023	67.4
2	840	S2_14967366	67.4
2	842	S2_15350589	67.57
2	841	S2_15723462	67.57
2	843	S2_16419310	67.94
2	844	S2_16423267	67.94
2	845	S2_16437059	68.17
2	846	S2_16492603	68.17
2	847	S2_16672680	68.4
2	848	S2_16856724	68.4
2	849	S2_16860921	68.86
2	850	S2_16865618	69.16
2	851	S2_17223726	69.16
2	852	S2_17619881	69.16
2	853	S2_17720515	69.16
2	854	S2_18236144	69.16
2	856	S2_18319843	69.58
2	855	S2_18381264	69.58
2	861	S2_19709787	70.06
2	858	S2_19714305	70.37
2	862	S2_19772550	70.87
2	863	S2_23297978	71.17
2	857	S2_29537032	71.48
2	865	S2_34412762	71.48
2	866	S2_36718407	71.48
2	867	S2_38281958	71.48
2	864	S2_39931017	71.48
2	868	S2_40302877	71.48
2	869	S2_47131393	71.48
2	859	S2_47721107	71.48
2	872	S2_49478342	71.48
2	871	S2_49675941	71.48
2	873	S2_50271691	72.15
2	874	S2_50703633	72.15
2	860	S2_51568264	72.61
2	875	S2_51718092	73.17
2	877	S2_54910826	73.65
2	876	S2_55016495	73.65
2	878	S2_55016534	73.65
2	879	S2_55058178	74.35
2	880	S2_55144414	74.35
2	882	S2_55275316	75.04
2	883	S2_55275389	75.26
2	884	S2_55299240	75.26
2	881	S2_55359013	75.26
2	885	S2_55359068	75.26
2	886	S2_55396202	75.53
2	887	S2_55481787	76.35
2	888	S2_55484864	76.35
2	889	S2_55568131	77.09
2	890	S2_55583634	77.57
2	891	S2_55694747	77.57
2	892	S2_55714967	77.83
2	893	S2_56060393	78.01
2	894	S2_56079920	78.01
2	895	S2_56119769	78.01
2	896	S2_56166345	78.57
2	897	S2_56276475	78.94
2	898	S2_56402176	79.13
2	899	S2_56406078	79.13
2	900	S2_56406184	79.13
2	901	S2_56484452	79.32
2	902	S2_56484602	79.32
2	903	S2_56839259	79.95
2	904	S2_56840256	79.95
2	905	S2_56840276	79.95
2	906	S2_56850832	79.95
2	907	S2_56886272	80.22
2	908	S2_56894504	80.79
2	909	S2_56899215	80.79
2	910	S2_56932797	81.17
2	911	S2_57054999	81.68
2	912	S2_57122239	81.68
2	913	S2_57129833	81.68
2	914	S2_57176301	82.28
2	915	S2_57225833	82.28
2	916	S2_57228325	82.28
2	917	S2_57403657	82.87
2	918	S2_57414542	83.06
2	920	S2_57488830	83.24
2	919	S2_57489770	83.24
2	922	S2_57617091	84.41
2	921	S2_57635457	84.41
2	923	S2_57704458	84.41
2	924	S2_57833017	86.18
2	926	S2_57991615	86.18
2	925	S2_57996060	86.35
2	927	S2_58110818	87.2
2	928	S2_58171190	87.49
2	929	S2_58180387	87.87
2	930	S2_58180612	87.87
2	931	S2_58182337	88.08
2	932	S2_58207273	88.29
2	933	S2_58209370	88.29
2	934	S2_58259790	88.47
2	935	S2_58365085	88.66
2	936	S2_58391250	89.03
2	937	S2_58423766	89.03
2	938	S2_58512024	89.44
2	939	S2_58522918	89.68
2	940	S2_58587494	89.68
2	941	S2_58651540	90.84
2	942	S2_58738858	91.68
2	943	S2_58738941	91.68
2	945	S2_58815915	92.08
2	944	S2_58830993	92.08
2	947	S2_58832769	92.08
2	946	S2_58832934	92.08
2	948	S2_58833006	92.08
2	949	S2_58838434	92.08
2	950	S2_58843482	92.32
2	951	S2_58924047	92.32
2	952	S2_59031052	92.57
2	953	S2_59031091	92.8
2	954	S2_59096112	92.8
2	955	S2_59632530	96.13
2	956	S2_59750545	97.06
2	957	S2_59792282	98.15
2	959	S2_59967877	99.4
2	960	S2_59984314	99.4
2	961	S2_60029652	99.58
2	958	S2_60066250	99.58
2	963	S2_60259627	100.41
2	964	S2_60260539	100.41
2	962	S2_60260540	100.41
2	965	S2_60317368	101.02
2	966	S2_60943542	104.95
2	967	S2_61131341	107.91
2	968	S2_61169439	107.91
2	969	S2_61273533	108.84
2	970	S2_61305070	109.1
2	972	S2_61338467	109.5
2	973	S2_61365963	109.72
2	974	S2_61388894	109.72
2	975	S2_61389782	109.72
2	971	S2_61390541	109.72
2	976	S2_61393919	109.72
2	977	S2_61394159	109.72
2	978	S2_61513789	110.32
2	980	S2_61609177	111.24
2	979	S2_61665141	111.24
2	981	S2_61669244	111.24
2	982	S2_61698157	111.24
2	983	S2_61701748	111.96
2	984	S2_61708328	111.96
2	985	S2_61746657	112.41
2	986	S2_61763555	112.74
2	987	S2_61776912	113.03
2	989	S2_61817817	113.03
2	988	S2_61823198	113.03
2	990	S2_61824838	113.28
2	991	S2_61930266	114.88
2	993	S2_61981713	115.36
2	992	S2_62004130	115.36
2	994	S2_62050687	115.9
2	995	S2_62056586	115.9
2	997	S2_62079141	115.9
2	996	S2_62089591	115.9
2	998	S2_62093306	116.15
2	999	S2_62180835	116.36
2	1000	S2_62190841	116.83
2	1001	S2_62270667	117.53
2	1002	S2_62270858	117.53
2	1003	S2_62278226	118.08
2	1004	S2_62278310	118.08
2	1005	S2_62312020	118.72
2	1006	S2_62312219	118.72
2	1007	S2_62351171	119.23
2	1008	S2_62374558	119.23
2	1009	S2_62414554	119.23
2	1010	S2_62445961	119.65
2	1011	S2_62454310	119.65
2	1012	S2_62465177	119.73
2	1013	S2_62466538	120.08
2	1014	S2_62467306	120.08
2	1015	S2_62666148	120.65
2	1016	S2_62679337	121.23
2	1017	S2_62691023	121.23
2	1018	S2_62691038	121.32
2	1019	S2_62691053	121.32
2	1021	S2_62899410	121.85
2	1020	S2_62935333	121.85
2	1022	S2_63019775	121.85
2	1023	S2_63020905	121.85
2	1024	S2_63039105	121.85
2	1025	S2_63101541	122.44
2	1027	S2_63156418	122.63
2	1028	S2_63156718	122.63
2	1026	S2_63177448	122.63
2	1029	S2_63178418	122.63
2	1030	S2_63179778	122.63
2	1031	S2_63256095	123.11
2	1032	S2_63256101	123.33
2	1033	S2_63310503	123.58
2	1034	S2_63311482	123.58
2	1035	S2_63330131	124.04
2	1036	S2_63345919	124.5
2	1037	S2_63347756	124.74
2	1038	S2_63349159	125.19
2	1039	S2_63408597	125.74
2	1040	S2_63428943	126.01
2	1041	S2_63451086	126.42
2	1043	S2_63472859	126.42
2	1042	S2_63473525	126.42
2	1045	S2_63531911	126.95
2	1044	S2_63544900	126.95
2	1046	S2_63637198	127.7
2	1047	S2_63761070	127.7
2	1048	S2_63761363	127.7
2	1049	S2_63765665	127.94
2	1050	S2_63780106	128.15
2	1051	S2_63789633	128.35
2	1052	S2_64092747	129.56
2	1053	S2_64092754	129.56
2	1054	S2_64097373	129.94
2	1056	S2_64097610	130.54
2	1057	S2_64098987	130.54
2	1058	S2_64103315	130.54
2	1059	S2_64167169	130.73
2	1060	S2_64168075	130.73
2	1055	S2_64171941	130.73
2	1062	S2_64173162	130.73
2	1061	S2_64179986	130.73
2	1063	S2_64268589	130.73
2	1064	S2_64419716	131.67
2	1066	S2_64599261	132.19
2	1065	S2_64702882	132.19
2	1067	S2_64799664	132.19
2	1068	S2_64884263	132.19
2	1069	S2_65067313	132.43
2	1070	S2_65082984	132.43
2	1071	S2_65103155	132.43
2	1072	S2_65141067	132.76
2	1073	S2_65175625	132.76
2	1074	S2_65194854	133.23
2	1075	S2_65194899	133.23
2	1076	S2_65210940	133.58
2	1077	S2_65463809	136.11
2	1078	S2_66684886	138.17
2	1079	S2_66818221	138.17
2	1080	S2_66818261	138.17
2	1081	S2_66859132	138.17
2	1082	S2_66878794	138.17
2	1083	S2_67150700	138.37
2	1084	S2_67209646	138.56
2	1085	S2_67238002	138.76
2	1086	S2_67248994	138.76
2	1087	S2_67273458	138.95
2	1088	S2_67359606	139.4
2	1089	S2_67396543	139.67
2	1090	S2_67595401	139.88
2	1092	S2_67609529	139.88
2	1091	S2_67632772	139.88
2	1093	S2_67632800	139.88
2	1094	S2_67730143	139.88
2	1095	S2_67821930	140.15
2	1096	S2_67959729	140.86
2	1097	S2_67959866	140.86
2	1098	S2_68038409	140.86
2	1099	S2_68187393	141.95
2	1100	S2_68216568	141.95
2	1102	S2_68234981	142.31
2	1101	S2_68248540	142.31
2	1103	S2_68336507	142.61
2	1104	S2_68390812	142.61
2	1105	S2_68390889	142.61
2	1106	S2_68460265	142.61
2	1107	S2_68481605	143.09
2	1108	S2_68481666	143.09
2	1109	S2_68676630	143.7
2	1110	S2_68684196	143.7
2	1111	S2_68898147	144.39
2	1112	S2_69213162	145.21
2	1113	S2_69442276	145.86
2	1114	S2_69638477	147.37
2	1115	S2_69675486	147.37
2	1117	S2_69707462	148.07
2	1118	S2_69709502	148.07
2	1116	S2_69769283	148.07
2	1119	S2_69775172	148.26
2	1121	S2_69854469	149.41
2	1120	S2_69854493	149.41
2	1122	S2_70032539	150.88
2	1123	S2_70212062	150.88
2	1124	S2_70212063	150.88
2	1125	S2_70349200	152.3
2	1126	S2_70349260	152.3
2	1127	S2_70349328	152.3
2	1128	S2_70370005	152.6
2	1129	S2_70443801	153.18
2	1130	S2_70539642	153.18
2	1131	S2_70547223	154.13
2	1132	S2_70561483	154.58
2	1133	S2_70567576	154.58
2	1134	S2_70570138	154.58
2	1135	S2_70586212	154.97
2	1136	S2_70594661	155.76
2	1137	S2_70609903	155.76
2	1138	S2_70834328	157.23
2	1139	S2_73329481	164.89
2	1140	S2_74123672	168.72
2	1141	S2_74125656	168.72
2	1142	S2_74163316	168.72
2	1143	S2_74252430	169.13
2	1144	S2_74301015	169.13
2	1145	S2_74353374	169.33
2	1146	S2_74383671	169.33
2	1147	S2_74406484	169.33
2	1148	S2_74422236	169.33
2	1149	S2_74646133	169.53
2	1150	S2_74818061	169.94
2	1151	S2_74825631	169.94
2	1152	S2_74941192	170.12
2	1153	S2_75107372	170.31
2	1154	S2_75109227	170.31
2	1155	S2_75147678	170.31
2	1156	S2_75166045	170.31
2	1157	S2_75500978	170.91
2	1158	S2_75617219	171.76
2	1159	S2_75854194	172.84
2	1160	S2_76154222	175.36
2	1161	S2_76199842	175.98
2	1163	S2_76276647	175.98
2	1164	S2_76277311	175.98
2	1165	S2_76322657	176.36
2	1166	S2_76340823	176.36
2	1162	S2_76353039	176.36
2	1167	S2_76379428	176.54
2	1168	S2_76380288	176.72
2	1169	S2_76383034	177.09
2	1170	S2_76383092	177.09
2	1171	S2_76403922	177.09
2	1172	S2_76444811	177.84
2	1174	S2_76450592	177.84
2	1175	S2_76506555	177.84
2	1173	S2_76506581	177.84
2	1176	S2_76553555	178.1
2	1177	S2_76561754	178.1
2	1178	S2_76625764	178.63
2	1179	S2_76630397	178.63
2	1181	S2_76695515	178.84
2	1180	S2_76696830	178.95
2	1182	S2_76701769	178.95
2	1183	S2_76715977	179.76
2	1184	S2_77013253	181.19
2	1185	S2_77126745	181.19
3	1223	S3_5304829	0
3	1226	S3_9852368	0.39
3	1228	S3_9938334	0.58
3	1229	S3_9952666	1.09
3	1230	S3_9975845	1.09
3	1232	S3_10020969	1.75
3	1231	S3_10083399	1.97
3	1233	S3_10179827	2.68
3	1234	S3_10217129	2.68
3	1235	S3_10262020	3.09
3	1236	S3_10288059	3.29
3	1237	S3_10332885	3.48
3	1238	S3_10339468	3.48
3	1239	S3_10417481	3.95
3	1240	S3_10431924	3.95
3	1241	S3_10444145	4.2
3	1242	S3_10503095	4.65
3	1243	S3_10505072	4.86
3	1244	S3_10542637	5.29
3	1245	S3_10542651	5.29
3	1246	S3_10543061	5.29
3	1247	S3_11135785	6.72
3	1248	S3_11297217	7.41
3	1249	S3_11297284	8.1
3	1250	S3_11407772	8.1
3	1251	S3_11407892	8.23
3	1252	S3_11706295	9.16
3	1253	S3_11706812	9.21
3	1255	S3_11976440	9.63
3	1254	S3_12034264	9.63
3	1256	S3_12183876	9.92
3	1258	S3_12193453	9.92
3	1257	S3_12248493	9.92
3	1259	S3_12345510	10.57
3	1260	S3_12517750	11
3	1261	S3_12525777	11
3	1262	S3_12568423	11
3	1264	S3_12688864	11.3
3	1265	S3_12839986	11.3
3	1263	S3_12880297	11.3
3	1266	S3_12883391	11.68
3	1267	S3_12883457	11.68
3	1268	S3_12908164	11.94
3	1270	S3_13102453	12.92
3	1269	S3_13102460	12.92
3	1271	S3_13107563	13.14
3	1272	S3_13165561	13.14
3	1273	S3_13202427	13.61
3	1274	S3_13252530	13.61
3	1275	S3_13266020	14.67
3	1276	S3_13510830	14.96
3	1277	S3_13520094	15.24
3	1278	S3_13642399	16.56
3	1279	S3_13650191	16.86
3	1280	S3_13666639	16.86
3	1281	S3_13670171	16.86
3	1282	S3_13690144	17.06
3	1283	S3_13742170	17.26
3	1284	S3_13763890	17.26
3	1285	S3_13782813	17.49
3	1286	S3_13904666	17.49
3	1287	S3_14063447	17.49
3	1289	S3_14080844	17.7
3	1288	S3_14149323	17.7
3	1290	S3_14161521	17.93
3	1292	S3_14220268	18.37
3	1291	S3_14220685	18.37
3	1293	S3_15057634	18.37
3	1294	S3_15178583	18.69
3	1295	S3_15317744	19.31
3	1296	S3_15376037	19.61
3	1297	S3_15439662	19.83
3	1298	S3_15445622	20.01
3	1300	S3_15453957	20.4
3	1303	S3_15689613	20.55
3	1301	S3_15690011	20.55
3	1302	S3_15748326	20.73
3	1304	S3_15784191	20.9
3	1305	S3_15784245	20.9
3	1299	S3_15784342	20.9
3	1306	S3_15837035	21.55
3	1307	S3_15883084	21.85
3	1308	S3_15900346	22.24
3	1309	S3_15954372	22.73
3	1310	S3_16130220	23.72
3	1311	S3_16197801	23.72
3	1312	S3_16332950	23.72
3	1313	S3_16420058	23.91
3	1314	S3_16555155	23.91
3	1317	S3_18259464	24.47
3	1318	S3_19715200	24.47
3	1315	S3_19996252	24.47
3	1316	S3_20002500	24.47
3	1319	S3_31589310	24.65
3	1320	S3_32120712	24.65
3	1323	S3_38233516	24.65
3	1322	S3_45314706	24.65
3	1324	S3_45566192	24.65
3	1321	S3_48031233	24.65
3	1326	S3_50787809	24.84
3	1325	S3_50905445	24.84
3	1327	S3_50909623	24.84
3	1329	S3_51031838	25.02
3	1330	S3_51076376	25.02
3	1331	S3_51136420	25.02
3	1328	S3_51161545	25.02
3	1332	S3_51183869	25.02
3	1333	S3_51364616	25.78
3	1334	S3_51390473	25.96
3	1335	S3_51466613	26.07
3	1336	S3_51475263	26.07
3	1338	S3_56085846	35.27
3	1337	S3_56086794	35.4
3	1339	S3_56086930	35.4
3	1340	S3_56157118	35.4
3	1342	S3_56163409	35.61
3	1341	S3_56163671	35.61
3	1344	S3_56288991	36.17
3	1343	S3_56309648	36.17
3	1345	S3_56394396	36.44
3	1347	S3_56563015	36.99
3	1346	S3_56565266	36.99
3	1348	S3_56596191	36.99
3	1349	S3_56697978	36.99
3	1350	S3_56737987	37.2
3	1351	S3_56774879	37.2
3	1352	S3_56813537	37.72
3	1353	S3_56884586	37.72
3	1354	S3_56921441	38.18
3	1355	S3_56973828	38.18
3	1356	S3_56991828	38.64
3	1357	S3_56991923	38.64
3	1358	S3_57010955	38.64
3	1359	S3_57099339	39.56
3	1361	S3_57116642	39.56
3	1362	S3_57119549	39.56
3	1360	S3_57154906	39.76
3	1363	S3_57180131	39.76
3	1364	S3_57206715	40.87
3	1366	S3_57224626	41.18
3	1365	S3_57251535	41.6
3	1367	S3_57354565	42.63
3	1368	S3_57375322	42.79
3	1369	S3_57385908	42.79
3	1370	S3_57513949	43.17
3	1371	S3_57519572	43.17
3	1372	S3_57519619	43.42
3	1373	S3_57582117	43.42
3	1374	S3_57615114	43.66
3	1375	S3_57691796	44.13
3	1376	S3_57699622	44.44
3	1377	S3_57727122	44.67
3	1378	S3_57728943	44.67
3	1380	S3_57882869	45.27
3	1381	S3_57919613	45.46
3	1379	S3_57923290	45.46
3	1382	S3_58200474	47.39
3	1383	S3_58248425	47.65
3	1384	S3_58352500	49.69
3	1386	S3_58433131	50.82
3	1385	S3_58453647	50.82
3	1387	S3_58607038	51.81
3	1388	S3_58715043	52.21
3	1389	S3_58744591	52.75
3	1390	S3_58746600	52.75
3	1391	S3_58802753	53.54
3	1392	S3_58848795	53.54
3	1393	S3_58872839	54.11
3	1394	S3_58874949	54.11
3	1395	S3_58904687	54.3
3	1396	S3_58927642	54.46
3	1397	S3_58927657	54.46
3	1398	S3_59010253	54.46
3	1399	S3_59011808	55.02
3	1400	S3_59021994	55.02
3	1401	S3_59221038	55.2
3	1402	S3_59221727	55.2
3	1403	S3_59221742	55.2
3	1404	S3_59308935	55.2
3	1405	S3_59334962	55.2
3	1406	S3_59384705	55.75
3	1407	S3_59395723	55.75
3	1409	S3_59447186	55.75
3	1408	S3_59451089	55.75
3	1410	S3_59466072	55.93
3	1413	S3_59599932	56.52
3	1411	S3_59699601	56.52
3	1412	S3_59704766	56.52
3	1414	S3_59734615	56.98
3	1415	S3_59750172	56.98
3	1416	S3_59773941	57.2
3	1417	S3_59811735	57.2
3	1418	S3_59830302	57.2
3	1419	S3_59840357	57.65
3	1420	S3_60018761	58
3	1421	S3_60019378	58.27
3	1424	S3_60136632	58.27
3	1422	S3_60138933	58.83
3	1425	S3_60138980	58.83
3	1423	S3_60161923	58.83
3	1426	S3_60187200	59.01
3	1427	S3_60201790	59.01
3	1428	S3_60209622	59.01
3	1429	S3_60215479	59.37
3	1430	S3_60234826	59.87
3	1431	S3_60267811	60.08
3	1433	S3_60268482	60.08
3	1435	S3_60277472	60.08
3	1432	S3_60287735	60.08
3	1436	S3_60291634	60.08
3	1434	S3_60315002	60.08
3	1437	S3_60361899	60.3
3	1438	S3_60388038	60.51
3	1439	S3_60465547	60.51
3	1441	S3_60558059	60.7
3	1442	S3_60574682	60.7
3	1444	S3_60601963	60.7
3	1445	S3_60602020	60.7
3	1446	S3_60628410	60.7
3	1443	S3_60662829	60.7
3	1440	S3_60709045	61.08
3	1447	S3_60709065	61.08
3	1448	S3_60809311	61.45
3	1449	S3_60816619	61.63
3	1451	S3_60911987	61.82
3	1450	S3_61004360	61.82
3	1454	S3_61012161	61.82
3	1453	S3_61040927	61.82
3	1452	S3_61049599	61.82
3	1456	S3_61350977	62.09
3	1455	S3_61392517	62.68
3	1457	S3_61512893	63.11
3	1458	S3_61513546	63.11
3	1459	S3_61532385	63.77
3	1460	S3_61540429	63.99
3	1461	S3_61588119	64.19
3	1462	S3_61591997	64.38
3	1463	S3_61592135	64.38
3	1464	S3_61609149	64.38
3	1465	S3_61680858	64.58
3	1466	S3_61722987	64.99
3	1467	S3_61742203	65.39
3	1468	S3_61746380	65.39
3	1469	S3_61799358	65.76
3	1470	S3_61879071	65.76
3	1471	S3_61918102	65.76
3	1472	S3_61931899	65.95
3	1473	S3_61953954	65.95
3	1474	S3_62070580	66.28
3	1475	S3_62211656	66.55
3	1477	S3_62425166	66.78
3	1476	S3_62427712	66.78
3	1478	S3_62441101	66.78
3	1479	S3_62450723	67.14
3	1480	S3_62470346	67.14
3	1481	S3_62470858	67.14
3	1482	S3_62480354	67.14
3	1483	S3_62484986	67.33
3	1484	S3_62585098	67.33
3	1485	S3_62645903	67.51
3	1486	S3_63224772	68.63
3	1487	S3_63239469	69.13
3	1488	S3_63242252	69.13
3	1489	S3_63342217	70.07
3	1490	S3_63385397	70.26
3	1492	S3_63607145	71.04
3	1493	S3_63670272	71.04
3	1494	S3_63696561	71.22
3	1495	S3_64281473	71.79
3	1496	S3_64443535	72.35
3	1497	S3_64459983	72.35
3	1498	S3_64470463	72.35
3	1500	S3_64692963	72.91
3	1499	S3_64723260	72.91
3	1501	S3_64789684	73.54
3	1502	S3_64804875	73.82
3	1503	S3_64853383	74.87
3	1504	S3_64895712	75.08
3	1505	S3_64929171	75.08
3	1507	S3_64959222	75.08
3	1508	S3_64989103	75.08
3	1506	S3_65005700	75.08
3	1509	S3_65279548	75.27
3	1510	S3_65315846	75.27
3	1511	S3_65386334	75.5
3	1512	S3_65449742	75.5
3	1513	S3_65621105	76.01
3	1514	S3_65704227	76.2
3	1515	S3_65713855	76.48
3	1516	S3_65880271	77.35
3	1518	S3_65902485	77.35
3	1517	S3_65928093	77.35
3	1520	S3_66055689	77.54
3	1519	S3_66107048	77.54
3	1521	S3_66126532	77.77
3	1522	S3_66126888	77.77
3	1523	S3_66176922	77.77
3	1524	S3_66371612	78.48
3	1525	S3_66371833	78.48
3	1526	S3_66416655	78.66
3	1527	S3_66418135	78.85
3	1528	S3_66430049	79.05
3	1529	S3_66444807	79.05
3	1530	S3_66772206	79.7
3	1531	S3_67586972	81.53
3	1532	S3_67594866	81.78
3	1533	S3_67735769	81.78
3	1534	S3_67909802	82.36
3	1535	S3_67928111	82.65
3	1536	S3_67934760	82.92
3	1537	S3_67942847	82.92
3	1538	S3_67943573	83.19
3	1539	S3_68049274	83.45
3	1540	S3_68051759	83.73
3	1541	S3_68073916	83.73
3	1542	S3_68075444	84.14
3	1544	S3_68112552	84.34
3	1543	S3_68113725	84.34
3	1545	S3_68163885	84.54
3	1546	S3_68171122	84.54
3	1547	S3_68192351	85.04
3	1548	S3_68192413	85.04
3	1549	S3_68255519	85.81
3	1550	S3_68261539	86.04
3	1552	S3_68344000	86.65
3	1551	S3_68344042	86.65
3	1553	S3_68354193	86.65
3	1554	S3_68423227	87.1
3	1555	S3_68616889	87.55
3	1556	S3_68682051	87.55
3	1557	S3_68721063	87.55
3	1558	S3_68770706	87.55
3	1560	S3_68853252	87.78
3	1559	S3_68853968	87.78
3	1561	S3_68858653	88.06
3	1562	S3_68937374	88.67
3	1563	S3_68967150	89.09
3	1564	S3_68975069	89.09
3	1565	S3_69121434	90.14
3	1566	S3_69150695	91
3	1567	S3_69269339	91.87
3	1568	S3_69275926	91.87
3	1569	S3_69366556	92.02
3	1570	S3_69440075	92.02
3	1571	S3_69453408	92.27
3	1572	S3_69503187	92.5
3	1573	S3_69538610	92.5
3	1574	S3_69625326	92.98
3	1575	S3_69625602	92.98
3	1576	S3_69652216	93.78
3	1577	S3_69670626	93.78
3	1578	S3_69698931	94.15
3	1579	S3_69723100	94.67
3	1580	S3_69723222	94.67
3	1581	S3_69749902	94.92
3	1582	S3_69843308	94.92
3	1583	S3_69925978	95.44
3	1584	S3_69926227	95.44
3	1585	S3_69956501	95.64
3	1586	S3_69956643	95.64
3	1587	S3_70157869	96.05
3	1588	S3_70176135	96.75
3	1589	S3_70193550	97.09
3	1590	S3_70261934	97.51
3	1591	S3_70268171	97.69
3	1592	S3_70278263	97.69
3	1595	S3_70304283	97.69
3	1594	S3_70486758	97.69
3	1593	S3_70512830	97.98
3	1596	S3_70513599	97.98
3	1597	S3_70547733	98.57
3	1598	S3_70551801	98.57
3	1599	S3_70563616	98.79
3	1600	S3_70596858	99.01
3	1601	S3_70653340	99.25
3	1602	S3_70681159	99.46
3	1603	S3_70711215	99.46
3	1604	S3_70748526	99.85
3	1605	S3_70775337	99.85
3	1606	S3_70836147	99.85
3	1607	S3_70846974	100.05
3	1608	S3_70862406	100.05
3	1609	S3_70862423	100.05
3	1610	S3_70867940	100.05
3	1611	S3_70999352	100.47
3	1612	S3_71238390	101.24
3	1613	S3_71253199	101.24
3	1614	S3_71268280	101.72
3	1615	S3_71268643	101.72
3	1616	S3_71390187	102.91
3	1617	S3_71391680	102.91
3	1619	S3_71433258	103.4
3	1620	S3_71440408	103.43
3	1621	S3_71441511	103.43
3	1622	S3_71441580	103.43
3	1618	S3_71442997	103.43
3	1624	S3_71444957	103.73
3	1623	S3_71457928	103.73
3	1625	S3_71540744	104.43
3	1627	S3_71646637	104.79
3	1629	S3_71711439	104.79
3	1626	S3_71717507	104.79
3	1628	S3_71719235	104.81
3	1630	S3_71719307	104.81
3	1631	S3_71737029	105.03
3	1632	S3_71738505	105.03
3	1634	S3_71819319	106.02
3	1633	S3_71828652	106.02
3	1635	S3_71877233	106.02
3	1637	S3_72088501	106.66
3	1636	S3_72092289	106.66
3	1638	S3_72129832	107.14
3	1639	S3_72144491	107.3
3	1640	S3_73490974	111.88
4	1641	S4_273007	0
4	1642	S4_359290	0
4	1643	S4_409552	0
4	1644	S4_442286	0.25
4	1645	S4_792459	0.7
4	1647	S4_808767	0.88
4	1648	S4_808807	0.88
4	1649	S4_837157	1.23
4	1650	S4_891999	1.23
4	1651	S4_1003901	2.08
4	1652	S4_1021562	2.59
4	1653	S4_1022995	2.59
4	1654	S4_1027201	2.59
4	1655	S4_1072423	2.78
4	1656	S4_1123697	2.78
4	1657	S4_1123734	2.78
4	1659	S4_1130380	2.78
4	1658	S4_1133448	2.78
4	1660	S4_1214116	3.82
4	1661	S4_1256761	3.82
4	1662	S4_1261951	4.03
4	1663	S4_1346715	4.22
4	1664	S4_1356365	4.22
4	1665	S4_1357516	4.22
4	1666	S4_1384342	4.41
4	1667	S4_1391428	4.41
4	1668	S4_1395200	4.66
4	1669	S4_1442632	5.05
4	1670	S4_1529162	5.77
4	1671	S4_1529178	5.77
4	1672	S4_1598565	6.16
4	1673	S4_1742346	7.31
4	1674	S4_2006828	7.31
4	1675	S4_2228729	8.1
4	1676	S4_2254695	8.1
4	1677	S4_2316670	8.1
4	1678	S4_2423665	8.25
4	1679	S4_2472924	8.63
4	1680	S4_2515799	8.82
4	1681	S4_2523449	8.82
4	1682	S4_2560131	9.2
4	1683	S4_2653523	9.53
4	1684	S4_2663517	9.53
4	1685	S4_2671362	9.72
4	1686	S4_2692659	10.06
4	1687	S4_2692836	10.61
4	1688	S4_2781202	10.61
4	1691	S4_3061743	10.98
4	1689	S4_3061871	10.98
4	1690	S4_3068895	10.98
4	1692	S4_3246252	10.98
4	1693	S4_3898930	12.65
4	1694	S4_3905800	13.16
4	1696	S4_3910895	13.43
4	1695	S4_3924618	13.43
4	1697	S4_4002059	13.43
4	1698	S4_4019124	13.43
4	1699	S4_4023580	13.66
4	1700	S4_4027062	13.66
4	1701	S4_4126324	14.81
4	1702	S4_4126444	14.81
4	1703	S4_4129721	14.81
4	1704	S4_4171663	15
4	1705	S4_4247711	15.27
4	1706	S4_4257987	15.86
4	1707	S4_4358054	15.86
4	1708	S4_4366227	16.76
4	1709	S4_4366414	16.76
4	1710	S4_4477077	17.94
4	1711	S4_4478387	17.94
4	1712	S4_4552501	18.36
4	1713	S4_5458463	23.3
4	1714	S4_6777208	28.34
4	1715	S4_7007900	30.28
4	1716	S4_7123211	31.46
4	1717	S4_7167421	31.67
4	1718	S4_7199383	31.9
4	1719	S4_7207071	32.46
4	1720	S4_7300073	33.4
4	1721	S4_7353440	33.93
4	1723	S4_7495092	34.39
4	1722	S4_7578855	34.39
4	1724	S4_7652739	34.73
4	1725	S4_7652905	34.73
4	1726	S4_7783447	34.98
4	1727	S4_7796364	35.29
4	1728	S4_7891284	35.8
4	1729	S4_7970320	36.1
4	1730	S4_8032943	36.68
4	1731	S4_8032993	36.68
4	1732	S4_8046905	36.68
4	1733	S4_8198653	38
4	1734	S4_8220616	38
4	1735	S4_8257990	38
4	1736	S4_8299251	38
4	1737	S4_8623408	40.07
4	1738	S4_8623410	40.07
4	1739	S4_8729635	42.67
4	1740	S4_8742311	42.86
4	1742	S4_8826950	45.38
4	1743	S4_8835418	45.38
4	1744	S4_8862117	45.38
4	1745	S4_8887828	45.94
4	1746	S4_8907072	46.13
4	1747	S4_8938808	46.52
4	1748	S4_8939121	46.52
4	1741	S4_8949010	46.52
4	1749	S4_8951087	46.52
4	1750	S4_8985489	48.34
4	1751	S4_9339959	48.99
4	1752	S4_9389062	49.22
4	1753	S4_9391117	49.46
4	1754	S4_9391877	49.46
4	1755	S4_9409178	50.03
4	1756	S4_9467803	50.21
4	1757	S4_9687592	50.39
4	1758	S4_9728840	50.6
4	1759	S4_9906500	51.03
4	1760	S4_9939254	51.29
4	1761	S4_9969780	51.76
4	1762	S4_10055427	51.95
4	1763	S4_10158984	52.66
4	1764	S4_10159127	52.82
4	1765	S4_10193156	52.82
4	1766	S4_10228408	53.68
4	1767	S4_10311398	55.9
4	1768	S4_10356919	56.55
4	1769	S4_10451109	57.18
4	1770	S4_10571291	57.38
4	1771	S4_10652078	57.38
4	1772	S4_11099588	57.38
4	1773	S4_11170671	57.8
4	1775	S4_11255369	57.8
4	1776	S4_11296323	57.8
4	1777	S4_11297055	57.8
4	1778	S4_11560129	58.31
4	1779	S4_11567154	58.31
4	1780	S4_11622941	58.31
4	1774	S4_11715538	58.31
4	1781	S4_12062979	58.56
4	1782	S4_12074403	58.63
4	1783	S4_12227645	59.33
4	1784	S4_12357342	60.31
4	1785	S4_12478023	60.57
4	1786	S4_13424910	60.85
4	1787	S4_13853127	61.13
4	1788	S4_13908419	61.13
4	1789	S4_13964166	61.13
4	1790	S4_14014335	61.13
4	1792	S4_14796588	61.13
4	1791	S4_16504827	61.13
4	1793	S4_16576179	61.26
4	1796	S4_40214804	61.31
4	1797	S4_40818561	61.31
4	1798	S4_41871119	61.31
4	1794	S4_43450395	61.55
4	1795	S4_45990114	61.8
4	1799	S4_46218558	61.8
4	1800	S4_47717376	61.8
4	1801	S4_49109188	62.05
4	1802	S4_49117071	62.05
4	1803	S4_49119343	62.48
4	1804	S4_49417275	63.37
4	1805	S4_49606067	63.37
4	1806	S4_49649946	63.37
4	1807	S4_49828445	63.55
4	1808	S4_50070432	64.13
4	1809	S4_50070711	64.13
4	1810	S4_50103853	64.27
4	1811	S4_50267041	65.19
4	1812	S4_50350158	65.19
4	1813	S4_50362423	65.34
4	1814	S4_51180515	68.53
4	1815	S4_51277790	69.28
4	1816	S4_51861463	73.31
4	1817	S4_51910780	73.75
4	1818	S4_52004430	75.28
4	1820	S4_52017548	75.28
4	1819	S4_52052070	75.28
4	1822	S4_52215819	76.12
4	1823	S4_52266344	77.18
4	1824	S4_52318287	77.41
4	1825	S4_52333000	77.86
4	1826	S4_52364944	78.45
4	1834	S4_53199083	79.15
4	1844	S4_53497493	83.55
4	1868	S4_55309270	88.73
4	1873	S4_55789019	90.63
4	1886	S4_56698404	96.23
4	1888	S4_56730443	96.23
4	1889	S4_56788514	96.47
4	1901	S4_57121449	98.22
4	1902	S4_57160754	98.22
4	1907	S4_57367723	98.22
4	1913	S4_58476068	100.28
4	1915	S4_58560089	100.72
4	1921	S4_58842287	102.75
4	1923	S4_58854813	102.98
4	1925	S4_58888656	103.45
4	1928	S4_58897660	103.67
4	1926	S4_58898881	103.67
4	1929	S4_58912563	103.67
4	1927	S4_58951777	103.67
4	1930	S4_59005450	103.86
4	1931	S4_59029741	103.86
4	1932	S4_59050327	104.43
4	1933	S4_59069592	104.43
4	1935	S4_59102993	104.65
4	1934	S4_59103238	104.65
4	1936	S4_59118638	104.65
4	1937	S4_59473447	104.65
4	1938	S4_59661260	104.84
4	1939	S4_59679205	104.84
4	1942	S4_60029876	105.46
4	1941	S4_60142404	105.46
4	1943	S4_60175912	105.46
4	1947	S4_60179776	105.53
4	1948	S4_60179787	105.53
4	1946	S4_60198496	105.76
4	1950	S4_60372255	105.76
4	1949	S4_60376578	105.76
4	1940	S4_60377530	105.76
4	1952	S4_60438254	106.03
4	1953	S4_60459788	106.03
4	1954	S4_60484708	106.22
4	1955	S4_60506993	106.54
4	1956	S4_60528058	106.56
4	1957	S4_60528134	106.56
4	1958	S4_60584996	106.77
4	1959	S4_60605837	107.42
4	1960	S4_60707639	107.85
4	1961	S4_60723017	107.85
4	1963	S4_60764311	108.08
4	1964	S4_60764384	108.08
4	1966	S4_60793196	108.26
4	1967	S4_60865600	108.64
4	1970	S4_60959829	108.64
4	1969	S4_61015647	108.84
4	1971	S4_61015664	108.86
4	1972	S4_61016334	108.86
4	1965	S4_61018750	108.86
4	1968	S4_61042011	108.86
4	1973	S4_61081690	108.86
4	1974	S4_61123232	109.33
4	1975	S4_61133693	109.33
4	1976	S4_61200081	109.33
4	1977	S4_61215332	109.33
4	1978	S4_61230677	109.52
4	1979	S4_61296099	109.72
4	1981	S4_61313199	109.72
4	1980	S4_61352247	109.72
4	1982	S4_61418711	109.72
4	1983	S4_61911885	114.45
4	1984	S4_61977324	114.63
4	1985	S4_61993288	115.3
4	1986	S4_62229918	115.97
4	1987	S4_62251857	116.68
4	1988	S4_62252006	116.68
4	1989	S4_62252055	116.68
4	1990	S4_62287102	117.52
4	1991	S4_62290418	117.52
4	1993	S4_62294425	117.92
4	1992	S4_62301287	117.92
4	1994	S4_62321661	118.47
4	1995	S4_62365809	118.8
4	1996	S4_62518962	118.98
4	1997	S4_62519093	118.98
4	1998	S4_62658114	119.52
4	1999	S4_62671880	119.52
4	2000	S4_62699876	119.63
4	2001	S4_62715796	119.91
4	2003	S4_62722012	120.55
4	2004	S4_62725517	120.73
4	2002	S4_62725520	120.96
4	2005	S4_62742484	120.96
4	2006	S4_62747128	120.96
4	2008	S4_62783167	121.74
4	2007	S4_62783217	121.74
4	2010	S4_62827318	122.17
4	2009	S4_62837047	122.39
4	2011	S4_62837884	122.39
4	2012	S4_62847113	122.39
4	2013	S4_62971303	122.61
4	2014	S4_62971383	122.61
4	2015	S4_63017116	122.84
4	2016	S4_63018417	122.84
4	2017	S4_63104280	124.98
4	2020	S4_63167589	124.98
4	2018	S4_63185160	124.98
4	2021	S4_63246362	124.98
4	2022	S4_63247494	124.98
4	2019	S4_63248157	124.98
4	2023	S4_63259788	124.98
4	2024	S4_63260025	124.98
4	2025	S4_63282537	125.4
4	2026	S4_63300976	125.54
4	2027	S4_63301115	125.54
4	2028	S4_63330817	125.92
4	2029	S4_63332817	125.92
4	2030	S4_63334578	126.26
4	2031	S4_63354185	126.92
4	2032	S4_63363054	126.92
4	2033	S4_63363063	126.92
4	2034	S4_63379703	127.37
4	2035	S4_63381377	127.39
4	2036	S4_63402225	127.58
4	2037	S4_63470267	128.06
4	2038	S4_63470542	128.06
4	2039	S4_63478611	128.06
4	2040	S4_63584906	128.61
4	2041	S4_63648009	128.61
4	2042	S4_63733439	128.97
4	2043	S4_63733641	128.97
4	2044	S4_63807729	129.24
4	2045	S4_63850572	129.59
4	2046	S4_63862079	129.59
4	2047	S4_63862498	129.59
4	2048	S4_63895082	129.59
4	2049	S4_63999832	130.03
4	2050	S4_64022275	130.03
4	2051	S4_64047304	130.48
4	2052	S4_64050631	130.48
4	2054	S4_64142113	131.09
4	2053	S4_64196515	131.09
4	2056	S4_64217650	131.09
4	2057	S4_64284302	131.09
4	2055	S4_64284386	131.09
4	2058	S4_64301115	131.09
4	2059	S4_64318326	131.47
4	2060	S4_64361238	132.24
4	2061	S4_64371273	132.24
4	2062	S4_64388466	132.24
4	2063	S4_64445175	132.58
4	2064	S4_64450175	132.58
4	2065	S4_64477182	132.85
4	2066	S4_64502385	132.85
4	2067	S4_64586670	133.18
4	2068	S4_64596576	133.71
4	2069	S4_64646056	133.71
4	2070	S4_64646161	133.71
4	2071	S4_64989385	133.71
4	2073	S4_65025354	134.22
4	2075	S4_65039259	134.22
4	2074	S4_65078140	134.5
4	2076	S4_65116253	134.5
4	2077	S4_65127459	134.5
4	2072	S4_65145599	134.5
4	2078	S4_65176849	134.72
4	2080	S4_65358127	135.06
4	2079	S4_65358603	135.06
4	2081	S4_65409993	135.88
4	2082	S4_65418245	135.88
4	2083	S4_65441297	136.28
4	2084	S4_65473872	136.28
4	2085	S4_65484883	137
4	2087	S4_65520440	137.53
4	2086	S4_65555283	138.11
4	2088	S4_65558865	138.11
4	2089	S4_65570056	138.11
4	2090	S4_65580749	138.29
4	2091	S4_65589121	138.53
4	2092	S4_65622210	138.81
4	2093	S4_65633303	139.37
4	2094	S4_65641313	139.37
4	2095	S4_65644502	139.37
4	2096	S4_65672812	139.58
4	2097	S4_65700088	139.58
4	2098	S4_65702545	139.58
4	2099	S4_65734896	140.15
4	2100	S4_65734944	140.15
4	2101	S4_65768377	140.27
4	2102	S4_65768490	140.27
4	2103	S4_65922091	141.33
4	2104	S4_65922193	141.33
4	2105	S4_66292665	142.05
4	2106	S4_66493195	143.01
4	2107	S4_66520071	143.49
4	2108	S4_66646649	143.89
4	2109	S4_66648098	143.89
4	2110	S4_66704724	144.11
4	2111	S4_66705316	144.11
4	2112	S4_66758202	144.49
4	2113	S4_66758323	144.49
4	2115	S4_66909521	145.11
4	2116	S4_66909703	145.11
4	2117	S4_66946178	145.11
4	2118	S4_67035865	145.33
4	2119	S4_67142941	145.33
4	2120	S4_67224763	145.33
4	2121	S4_67276310	145.84
4	2123	S4_67442575	145.84
4	2122	S4_67522801	145.84
4	2124	S4_67774371	145.84
4	2114	S4_67845518	145.84
4	2125	S4_67845533	145.84
4	2126	S4_67935741	145.88
5	2127	S5_2047929	0
5	2129	S5_2270426	0.45
5	2128	S5_2279447	0.45
5	2130	S5_2291447	0.84
5	2131	S5_2459115	1.39
5	2132	S5_2562535	1.52
5	2133	S5_2562581	1.52
5	2134	S5_2682170	2.8
5	2135	S5_2683985	3.21
5	2136	S5_2684065	3.21
5	2137	S5_2687440	3.21
5	2138	S5_2704780	3.67
5	2139	S5_2714487	3.67
5	2140	S5_2752521	4.13
5	2141	S5_2789765	4.63
5	2142	S5_2804365	4.63
5	2143	S5_2820424	4.83
5	2144	S5_2943201	6.06
5	2145	S5_2977577	6.37
5	2146	S5_2983847	6.37
5	2147	S5_2983907	6.37
5	2148	S5_3081617	8.42
5	2149	S5_3130667	8.9
5	2150	S5_3149232	9.11
5	2152	S5_3281219	9.44
5	2151	S5_3295426	9.44
5	2153	S5_3317559	10.04
5	2154	S5_3317633	10.04
5	2156	S5_3429560	12.06
5	2155	S5_3429669	12.06
5	2158	S5_3477084	12.29
5	2157	S5_3500353	12.38
5	2159	S5_3520034	12.57
5	2160	S5_3529454	12.57
5	2162	S5_3599354	13.08
5	2161	S5_3641576	13.31
5	2164	S5_3660211	13.54
5	2163	S5_3672778	13.63
5	2165	S5_3725719	13.63
5	2166	S5_3860505	15.08
5	2167	S5_4015513	15.6
5	2168	S5_4015584	15.6
5	2169	S5_4077880	16.64
5	2170	S5_4256553	17.59
5	2171	S5_4290062	17.59
5	2172	S5_4510143	21.35
5	2173	S5_4527467	21.35
5	2175	S5_4712676	21.81
5	2176	S5_4713417	22
5	2177	S5_4727453	22
5	2178	S5_4767746	22.38
5	2179	S5_4772733	22.38
5	2180	S5_4817512	22.61
5	2181	S5_5054986	23.35
5	2182	S5_5055490	23.35
5	2183	S5_5148567	25.3
5	2184	S5_5186687	25.3
5	2185	S5_5263514	26.05
5	2186	S5_5327666	26.72
5	2187	S5_5330134	26.72
5	2188	S5_5330171	26.72
5	2189	S5_5585404	27.96
5	2190	S5_5625950	28.52
5	2191	S5_5642428	28.9
5	2192	S5_5643922	29.11
5	2193	S5_5644232	29.11
5	2195	S5_5867672	30.85
5	2196	S5_5871700	30.85
5	2197	S5_5883597	31.12
5	2194	S5_5893230	31.12
5	2198	S5_5975046	31.27
5	2199	S5_6438301	35.41
5	2200	S5_6450072	36.03
5	2201	S5_6485688	36.03
5	2202	S5_6718931	36.03
5	2203	S5_6754524	36.03
5	2204	S5_6848437	36.63
5	2205	S5_6848546	36.76
5	2206	S5_6928331	37.95
5	2207	S5_6932272	37.95
5	2208	S5_6934617	37.95
5	2209	S5_7254487	41.15
5	2210	S5_7442622	44.03
[truncated: 1,768 more rows]
